# Supplementary material
Source: PubMed Central journal article supplement (PMC5821249)
Supplement: NIHMS807817-supplement-1.pdf [file NIHMS807817-supplement-1.pdf]

**Cell, Volume 36**

**Supplemental Information**

**Epigenetic Mechanisms of Longevity and Aging**

**Payel Sen, Parisha P. Shah, Raffaella Nativio, and Shelley L. Berger**

**Supplemental Table 1: Epigenetic pathways of aging and longevity in different model organisms**

| <b>Models</b>                  | <b>Epigenetic changes linked to aging</b>                                                                                                                             | <b>Physiological consequence</b>                                                                    | <b>Experimental intervention to improve longevity/healthspan</b>                                                       | <b>Reference</b>                                               |
|--------------------------------|-----------------------------------------------------------------------------------------------------------------------------------------------------------------------|-----------------------------------------------------------------------------------------------------|------------------------------------------------------------------------------------------------------------------------|----------------------------------------------------------------|
| Yeast (replicative lifespan)   | Canonical histone loss                                                                                                                                                | Transcriptional amplification                                                                       | Overexpression of histones                                                                                             | (Feser et al., 2010)                                           |
|                                | Decrease in Sir2                                                                                                                                                      | Loss of heterochromatin at subtelomeric and rDNA loci, increase of H4K16ac and accumulation of ERCs | Overexpression of <i>SIR2</i> , deletion of <i>SAS2</i> , resveratrol and STACs                                        | (Dang et al., 2009; Kaeberlein et al., 1999; Kim et al., 1999) |
|                                | Increased occupancy of chromatin remodeling complex RSC genome-wide upon rapamycin treatment                                                                          | Downregulation of TORC1 signaling                                                                   | Rapamycin treatment, calorie restriction                                                                               | (Damelin et al., 2002)                                         |
|                                | Release of Esa1 binding from RP promoters upon nutrient starvation or rapamycin treatment, reduced H3K56ac globally and locally at rDNA loci upon rapamycin treatment |                                                                                                     |                                                                                                                        | (Chen et al., 2012; Rohde and Cardenas, 2003)                  |
|                                | Loss of H3K36me3 in a subset of genes                                                                                                                                 | Upregulation of cryptic transcription                                                               | Deletion of <i>RPH1</i>                                                                                                | (Sen et al., 2015)                                             |
|                                | Upregulation of stress response genes upon deletion of <i>ISW2</i>                                                                                                    | Calorie restriction, stress response                                                                | Deletion of <i>ISW2</i> , calorie restriction                                                                          | (Dang et al., 2014)                                            |
| Yeast (chronological lifespan) | Gene expression changes induced by deletion of <i>RAS2</i> via stress response transcription factors                                                                  | Calorie restriction, Ras/AC/PKA pathway, stress response                                            | Deletion of <i>RAS2</i>                                                                                                | (Fabrizio et al., 2003; Longo, 1999; Pedruzzi et al., 2000)    |
|                                | Mitochondria to nucleus signaling and Rph1-mediated chromatin changes                                                                                                 | Hormetic response of mtROS                                                                          |                                                                                                                        | (Schroeder et al., 2013)                                       |
| Worm                           | DAF-16-mediated recruitment of SWI/SNF                                                                                                                                | Stress resistance, dauer formation and longevity through the insulin signaling pathway              |                                                                                                                        | (Riedel et al., 2013)                                          |
|                                | Possible histone acetylation by TOR at ribosomal protein genes                                                                                                        | Activation of TOR pathway                                                                           | Rapamycin treatment                                                                                                    | (Wullschleger et al., 2006)                                    |
|                                | Possible SIR-2.1 mediated deacetylation of histones                                                                                                                   | Consequences of calorie restriction                                                                 | SIR-2.1 overexpression, boosting NAD <sup>+</sup> levels by calorie restriction, treatment with PARP enzyme inhibitors | (Tissenbaum and Guarente, 2001)                                |
|                                | Chromatin remodeling by worm <i>ISW2</i> component <i>ATHP2</i> , possibly also upregulating stress response genes upon deletion                                      | Consequences of calorie restriction                                                                 | RNAi of <i>athp-2</i> , calorie restriction                                                                            | (Dang et al., 2014)                                            |
|                                | Changes in H3K4me3                                                                                                                                                    | Transcription                                                                                       | RNAi of                                                                                                                | (Greer et al., 2010)                                           |

|              |                                                               |                                                                                                                                               |                                                                                                                                                                          |                                          |
|--------------|---------------------------------------------------------------|-----------------------------------------------------------------------------------------------------------------------------------------------|--------------------------------------------------------------------------------------------------------------------------------------------------------------------------|------------------------------------------|
|              |                                                               | upregulation                                                                                                                                  | methyltransferase subunits or overexpression of <i>rbr-2</i> demethylase affecting H3K4me3                                                                               |                                          |
|              | Changes in H3K27me3 (down globally) in somatic cells          | Insulin signaling pathway                                                                                                                     | RNAi of <i>utx-1</i> demethylase                                                                                                                                         | (Maures et al., 2011)                    |
|              | Possible loss of H3K36me3 in a subset of genes                | Upregulation of cryptic transcription                                                                                                         | RNAi of <i>RPH1</i> homolog <i>jmjd-2</i> and methyl binders F15E6.1 and T09A5.8                                                                                         | (Sen et al., 2015)                       |
|              | Global loss of H3K36me3 upon reduction of <i>met-1</i>        | Gene expression variation during aging and shorter lifespan                                                                                   | Unknown                                                                                                                                                                  | (Pu et al., 2015)                        |
|              | DNA methylation on N6 adenine (6mA)                           | Unknown                                                                                                                                       | Unknown                                                                                                                                                                  | (Greer et al., 2015)                     |
| Fly          | Upregulation of <i>Sir2</i> and downregulation of <i>Rpd3</i> | Lifespan extension upon calorie restriction                                                                                                   | Overexpression of <i>Sir2</i> , RNAi of <i>Rpd3</i> , HDAC inhibitors although dosage and time of administration must be tightly controlled to observe longevity effects | (Rogina et al., 2002; Wood et al., 2004) |
|              | Overexpression/downregulation of <i>Lid</i>                   | Lifespan extension/lifespan reduction by changing H3K4me3 global levels                                                                       | Overexpression of <i>Lid</i> demethylase                                                                                                                                 | (Li et al., 2010)                        |
|              | Mutations in PRC2 subunits <i>E(z)</i> and <i>esc</i>         | Lifespan extension through H3K27me3 global downregulation                                                                                     | RNAi of PRC2 components <i>E(z)</i> and <i>esc</i>                                                                                                                       | (Siebold et al., 2010)                   |
|              | Mutations in <i>trx</i>                                       | Suppression of longevity phenotype on the <i>E(z)</i> mutants through increase in H3K27me3                                                    | Mutating <i>trx</i> in <i>E(z)</i> mutants                                                                                                                               |                                          |
|              | Overexpression of DNA methyltransferase <i>Dnmt2</i>          | Lifespan extension through CpG methylation                                                                                                    | Overexpression of <i>Dnmt2</i>                                                                                                                                           | (Lin et al., 2005)                       |
| Killifish    | Upregulation of H3K27me3                                      | Upregulation of ribosome, lysosome and complement activation genes. downregulation of synapse, mitochondria, proteasome and spliceosome genes |                                                                                                                                                                          | (Baumgart et al., 2014)                  |
| Normal mouse | Increase of macroH2A with age                                 | Age-associated gain                                                                                                                           |                                                                                                                                                                          | (Kreiling et al.,                        |

|                               |                                                                                                  |                                                                                                                                  |                                                    |                                                   |
|-------------------------------|--------------------------------------------------------------------------------------------------|----------------------------------------------------------------------------------------------------------------------------------|----------------------------------------------------|---------------------------------------------------|
|                               | Increase in HP1b with age                                                                        | in heterochromatin                                                                                                               |                                                    | 2011)                                             |
|                               | Increase in H4K20me3 (rat)                                                                       |                                                                                                                                  |                                                    | (Sarg et al., 2002)                               |
|                               | Overexpression of <i>Sirt1</i>                                                                   | Increased health benefits (lower levels of DNA damage, fewer spontaneous carcinomas and sarcomas) but not longevity              |                                                    | (Herranz et al., 2010; Libert and Guarente, 2013) |
|                               | Overexpression of neuronal <i>Sirt1</i>                                                          | Lifespan extension and delayed aging                                                                                             |                                                    | (Satoh et al., 2013)                              |
|                               | Overexpression of <i>Sirt6</i> (H3K9 and H3K56 deacetylation)                                    | Maximum lifespan increase in male mice                                                                                           |                                                    | (Kanfi et al., 2012)                              |
| Long-lived dwarf mouse models | Reduced levels of DNMT1 in Ames mice liver                                                       | Lifespan extension/growth retardation through the IGF1 pathway                                                                   |                                                    | (Armstrong et al., 2014)                          |
| Premature aging mouse models  | Hypermethylation at rDNA and hypoacetylation on core histones H4 and H2B in <i>Zmpste24</i> mice | Premature aging and age-related pathologies: deregulation of lamin A network                                                     |                                                    | (Oakes et al., 2003; Osorio et al., 2010)         |
|                               | BUBR1 (acetylated by CBP and deacetylated by SIRT2) deficient mice                               | Reduced lifespan, accelerated onset of age-related pathologies and accumulation of senescent cells (mitotic checkpoint response) | Overexpression <i>Sirt2</i> or treatment with NAD+ | (Corrigan et al., 2005)                           |
|                               | Overexpression of <i>Sirt2</i> or NAD+ precursor treatment in <i>BubR1</i> mutant mice           | Increased BUBR1 levels and median lifespan                                                                                       |                                                    | (North et al., 2014)                              |
| Senescent cell cultures       | Increase in H3K9me3, H3K27me3, HMGA                                                              | Formation of SAHF                                                                                                                |                                                    | (Chandra et al., 2012)                            |
|                               | Loss of EZH2 and H3K27me3                                                                        | Upregulation of p16INK4a                                                                                                         |                                                    | (Bracken et al., 2007)                            |
|                               | Loss of Lamin B1                                                                                 | Transcriptional downregulation and autophagic degradation of Lamin B1 with possible nuclear disorganization                      |                                                    | (Dou et al., 2015; Shimi et al., 2011)            |
|                               | Gains in H3K4me3 and H3K27me3 over LAD and loss of H3K27me3 outside LAD                          | Activation of SASP genes and downregulation of cell-cycle genes                                                                  |                                                    | (Shah et al., 2013)                               |
|                               | Gains in H4K16ac at promoters of expressed genes mediated by HIRA                                | Dynamic chromatin state with the maintenance of                                                                                  |                                                    | (Rai et al., 2014)                                |

|            |                                                                                     |                                                                      |  |                                              |
|------------|-------------------------------------------------------------------------------------|----------------------------------------------------------------------|--|----------------------------------------------|
|            |                                                                                     | H4K16ac in senescent cells                                           |  |                                              |
|            | H3.3 in PML bodies                                                                  | Formation of SAHF                                                    |  |                                              |
|            | Knockdown of <i>BAZ1A</i>                                                           | Upregulation of stress response genes                                |  | (Dang et al., 2014)                          |
| Stem cells | Broadening of H3K4me3 and H3K27me3 peaks, upregulated expression of repeat elements | Reduction in TGF $\beta$ signaling and myeloid differentiation (HSC) |  | (Sun et al., 2014)                           |
| Tissues    | Accumulation of macroH2A and HP1b in aging mouse and primate tissue                 | Gain of heterochromatin                                              |  | (Herbig et al., 2006; Kreiling et al., 2011) |
|            | Promoter hypermethylation and global hypomethylation                                |                                                                      |  | (Day et al., 2013)                           |
|            | Methylation clock                                                                   |                                                                      |  | (Horvath, 2013, 2015)                        |
|            | Rate of change of the DNA methylome from human blood                                |                                                                      |  | (Hannum et al., 2013)                        |

## References

- Armstrong, V.L., Rakoczy, S., Rojanathammanee, L., and Brown-Borg, H.M. (2014). Expression of DNA methyltransferases is influenced by growth hormone in the long-living Ames dwarf mouse in vivo and in vitro. *J Gerontol A Biol Sci Med Sci* 69, 923-933.
- Baumgart, M., Groth, M., Priebe, S., Savino, A., Testa, G., Dix, A., Ripa, R., Spallotta, F., Gaetano, C., Ori, M., *et al.* (2014). RNA-seq of the aging brain in the short-lived fish *N. furzeri* - conserved pathways and novel genes associated with neurogenesis. *Aging Cell* 13, 965-974.
- Bracken, A.P., Kleine-Kohlbrecher, D., Dietrich, N., Pasini, D., Gargiulo, G., Beekman, C., Theilgaard-Monch, K., Minucci, S., Porse, B.T., Marine, J.C., *et al.* (2007). The Polycomb group proteins bind throughout the *INK4A-ARF* locus and are disassociated in senescent cells. *Genes Dev* 21, 525-530.
- Chandra, T., Kirschner, K., Thuret, J.Y., Pope, B.D., Ryba, T., Newman, S., Ahmed, K., Samarajiwa, S.A., Salama, R., Carroll, T., *et al.* (2012). Independence of repressive histone marks and chromatin compaction during senescent heterochromatic layer formation. *Mol Cell* 47, 203-214.
- Chen, H., Fan, M., Pfeffer, L.M., and Larabee, R.N. (2012). The histone H3 lysine 56 acetylation pathway is regulated by target of rapamycin (TOR) signaling and functions directly in ribosomal RNA biogenesis. *Nucleic Acids Res* 40, 6534-6546.
- Corrigan, D.P., Kuszczak, D., Rusinol, A.E., Thewke, D.P., Hrycyna, C.A., Michaelis, S., and Sinensky, M.S. (2005). Prelamin A endoproteolytic processing in vitro by recombinant Zmpste24. *Biochem J* 387, 129-138.
- Damelin, M., Simon, I., Moy, T.I., Wilson, B., Komili, S., Tempst, P., Roth, F.P., Young, R.A., Cairns, B.R., and Silver, P.A. (2002). The genome-wide localization of Rsc9, a component of the RSC chromatin-remodeling complex, changes in response to stress. *Mol Cell* 9, 563-573.
- Dang, W., Steffen, K.K., Perry, R., Dorsey, J.A., Johnson, F.B., Shilatifard, A., Kaeberlein, M., Kennedy, B.K., and Berger, S.L. (2009). Histone H4 lysine 16 acetylation regulates cellular lifespan. *Nature* 459, 802-807.
- Dang, W., Sutphin, G.L., Dorsey, J.A., Otte, G.L., Cao, K., Perry, R.M., Wanat, J.J., Saviolaki, D., Murakami, C.J., Tsuchiyama, S., *et al.* (2014). Inactivation of yeast Isw2 chromatin remodeling enzyme mimics longevity effect of calorie restriction via induction of genotoxic stress response. *Cell Metab* 19, 952-966.
- Day, K., Waite, L.L., Thalacker-Mercer, A., West, A., Bamman, M.M., Brooks, J.D., Myers, R.M., and Absher, D. (2013). Differential DNA methylation with age displays both common and dynamic features across human tissues that are influenced by CpG landscape. *Genome Biol* 14, R102.
- Dou, Z., Xu, C., Donahue, G., Shimi, T., Pan, J.A., Zhu, J., Ivanov, A., Capell, B.C., Drake, A.M., Shah, P.P., *et al.* (2015). Autophagy mediates degradation of nuclear lamina. *Nature*.

Fabrizio, P., Liou, L.L., Moy, V.N., Diaspro, A., Valentine, J.S., Gralla, E.B., and Longo, V.D. (2003). SOD2 functions downstream of Sch9 to extend longevity in yeast. *Genetics* *163*, 35-46.

Feser, J., Truong, D., Das, C., Carson, J.J., Kieft, J., Harkness, T., and Tyler, J.K. (2010). Elevated histone expression promotes life span extension. *Mol Cell* *39*, 724-735.

Greer, E.L., Blanco, M.A., Gu, L., Sendinc, E., Liu, J., Aristizabal-Corrales, D., Hsu, C.H., Aravind, L., He, C., and Shi, Y. (2015). DNA Methylation on N6-Adenine in *C. elegans*. *Cell* *161*, 868-878.

Greer, E.L., Maures, T.J., Hauswirth, A.G., Green, E.M., Leeman, D.S., Maro, G.S., Han, S., Banko, M.R., Gozani, O., and Brunet, A. (2010). Members of the H3K4 trimethylation complex regulate lifespan in a germline-dependent manner in *C. elegans*. *Nature* *466*, 383-387.

Hannum, G., Guinney, J., Zhao, L., Zhang, L., Hughes, G., Satta, S., Klotzle, B., Bibikova, M., Fan, J.B., Gao, Y., *et al.* (2013). Genome-wide methylation profiles reveal quantitative views of human aging rates. *Mol Cell* *49*, 359-367.

Herbig, U., Ferreira, M., Condell, L., Carey, D., and Sedivy, J.M. (2006). Cellular senescence in aging primates. *Science* *311*, 1257.

Herranz, D., Munoz-Martin, M., Canamero, M., Mulero, F., Martinez-Pastor, B., Fernandez-Capetillo, O., and Serrano, M. (2010). Sirt1 improves healthy ageing and protects from metabolic syndrome-associated cancer. *Nat Commun* *1*, 3.

Horvath, S. (2013). DNA methylation age of human tissues and cell types. *Genome Biol* *14*, R115.

Horvath, S. (2015). Erratum to: DNA methylation age of human tissues and cell types. *Genome Biol* *16*, 96.

Kaeberlein, M., McVey, M., and Guarente, L. (1999). The SIR2/3/4 complex and SIR2 alone promote longevity in *Saccharomyces cerevisiae* by two different mechanisms. *Genes Dev* *13*, 2570-2580.

Kanfi, Y., Naiman, S., Amir, G., Peshti, V., Zinman, G., Nahum, L., Bar-Joseph, Z., and Cohen, H.Y. (2012). The sirtuin SIRT6 regulates lifespan in male mice. *Nature* *483*, 218-221.

Kim, S., Benguria, A., Lai, C.Y., and Jazwinski, S.M. (1999). Modulation of life-span by histone deacetylase genes in *Saccharomyces cerevisiae*. *Mol Biol Cell* *10*, 3125-3136.

Kreiling, J.A., Tamamori-Adachi, M., Sexton, A.N., Jeyapalan, J.C., Munoz-Najar, U., Peterson, A.L., Manivannan, J., Rogers, E.S., Pchelintsev, N.A., Adams, P.D., *et al.* (2011). Age-associated increase in heterochromatic marks in murine and primate tissues. *Aging Cell* *10*, 292-304.

Li, L., Greer, C., Eisenman, R.N., and Secombe, J. (2010). Essential functions of the histone demethylase lid. *PLoS Genet* *6*, e1001221.

Libert, S., and Guarente, L. (2013). Metabolic and neuropsychiatric effects of calorie restriction and sirtuins. *Annu Rev Physiol* *75*, 669-684.

Lin, M.J., Tang, L.Y., Reddy, M.N., and Shen, C.K. (2005). DNA methyltransferase gene dNmt2 and longevity of *Drosophila*. *J Biol Chem* *280*, 861-864.

Longo, V.D. (1999). Mutations in signal transduction proteins increase stress resistance and longevity in yeast, nematodes, fruit flies, and mammalian neuronal cells. *Neurobiol Aging* *20*, 479-486.

Maures, T.J., Greer, E.L., Hauswirth, A.G., and Brunet, A. (2011). The H3K27 demethylase UTX-1 regulates *C. elegans* lifespan in a germline-independent, insulin-dependent manner. *Aging Cell* *10*, 980-990.

North, B.J., Rosenberg, M.A., Jeganathan, K.B., Hafner, A.V., Michan, S., Dai, J., Baker, D.J., Cen, Y., Wu, L.E., Sauve, A.A., *et al.* (2014). SIRT2 induces the checkpoint kinase BubR1 to increase lifespan. *EMBO J* *33*, 1438-1453.

Oakes, C.C., Smiraglia, D.J., Plass, C., Trasler, J.M., and Robaire, B. (2003). Aging results in hypermethylation of ribosomal DNA in sperm and liver of male rats. *Proc Natl Acad Sci U S A* *100*, 1775-1780.

Osorio, F.G., Varela, I., Lara, E., Puente, X.S., Espada, J., Santoro, R., Freije, J.M., Fraga, M.F., and Lopez-Otin, C. (2010). Nuclear envelope alterations generate an aging-like epigenetic pattern in mice deficient in Zmpste24 metalloprotease. *Aging Cell* *9*, 947-957.

Pedruzzi, I., Burckert, N., Egger, P., and De Virgilio, C. (2000). *Saccharomyces cerevisiae* Ras/cAMP pathway controls post-diauxic shift element-dependent transcription through the zinc finger protein Gis1. *EMBO J* *19*, 2569-2579.

Pu, M., Ni, Z., Wang, M., Wang, X., Wood, J.G., Helfand, S.L., Yu, H., and Lee, S.S. (2015). Trimethylation of Lys36 on H3 restricts gene expression change during aging and impacts life span. *Genes Dev* *29*, 718-731.

Rai, T.S., Cole, J.J., Nelson, D.M., Dikovskaya, D., Faller, W.J., Vizioli, M.G., Hewitt, R.N., Anannya, O., McBryan, T., Manoharan, I., *et al.* (2014). HIRA orchestrates a dynamic chromatin landscape in senescence and is required for suppression of neoplasia. *Genes Dev* *28*, 2712-2725.

Riedel, C.G., Downen, R.H., Lourenco, G.F., Kirienko, N.V., Heimbucher, T., West, J.A., Bowman, S.K., Kingston, R.E., Dillin, A., Asara, J.M., *et al.* (2013). DAF-16 employs the chromatin remodeller SWI/SNF to promote stress resistance and longevity. *Nat Cell Biol* *15*, 491-501.

Rogina, B., Helfand, S.L., and Frankel, S. (2002). Longevity regulation by *Drosophila* Rpd3 deacetylase and caloric restriction. *Science* 298, 1745.

Rohde, J.R., and Cardenas, M.E. (2003). The tor pathway regulates gene expression by linking nutrient sensing to histone acetylation. *Mol Cell Biol* 23, 629-635.

Sarg, B., Koutzamani, E., Helliger, W., Rundquist, I., and Lindner, H.H. (2002). Postsynthetic trimethylation of histone H4 at lysine 20 in mammalian tissues is associated with aging. *J Biol Chem* 277, 39195-39201.

Satoh, A., Brace, C.S., Rensing, N., Cliften, P., Wozniak, D.F., Herzog, E.D., Yamada, K.A., and Imai, S. (2013). Sirt1 extends life span and delays aging in mice through the regulation of Nk2 homeobox 1 in the DMH and LH. *Cell Metab* 18, 416-430.

Schroeder, E.A., Raimundo, N., and Shadel, G.S. (2013). Epigenetic silencing mediates mitochondria stress-induced longevity. *Cell Metab* 17, 954-964.

Sen, P., Dang, W., Donahue, G., Dai, J., Dorsey, J., Cao, X., Liu, W., Cao, K., Perry, R., Lee, J.Y., *et al.* (2015). H3K36 methylation promotes longevity by enhancing transcriptional fidelity. *Genes Dev* 29, 1362-1376.

Shah, P.P., Donahue, G., Otte, G.L., Capell, B.C., Nelson, D.M., Cao, K., Aggarwala, V., Cruickshanks, H.A., Rai, T.S., McBryan, T., *et al.* (2013). Lamin B1 depletion in senescent cells triggers large-scale changes in gene expression and the chromatin landscape. *Genes Dev* 27, 1787-1799.

Shimi, T., Butin-Israeli, V., Adam, S.A., Hamanaka, R.B., Goldman, A.E., Lucas, C.A., Shumaker, D.K., Kosak, S.T., Chandel, N.S., and Goldman, R.D. (2011). The role of nuclear lamin B1 in cell proliferation and senescence. *Genes Dev* 25, 2579-2593.

Siebold, A.P., Banerjee, R., Tie, F., Kiss, D.L., Moskowitz, J., and Harte, P.J. (2010). Polycomb Repressive Complex 2 and Trithorax modulate *Drosophila* longevity and stress resistance. *Proc Natl Acad Sci U S A* 107, 169-174.

Sun, D., Luo, M., Jeong, M., Rodriguez, B., Xia, Z., Hannah, R., Wang, H., Le, T., Faull, K.F., Chen, R., *et al.* (2014). Epigenomic profiling of young and aged HSCs reveals concerted changes during aging that reinforce self-renewal. *Cell Stem Cell* 14, 673-688.

Tissenbaum, H.A., and Guarente, L. (2001). Increased dosage of a sir-2 gene extends lifespan in *Caenorhabditis elegans*. *Nature* 410, 227-230.

Wood, J.G., Rogina, B., Lavu, S., Howitz, K., Helfand, S.L., Tatar, M., and Sinclair, D. (2004). Sirtuin activators mimic caloric restriction and delay ageing in metazoans. *Nature* 430, 686-689.

Wullschlegel, S., Loewith, R., and Hall, M.N. (2006). TOR signaling in growth and metabolism. *Cell* 124, 471-484.

**Supplemental Table 2- Protocols for aging research**

| <b>Models</b>                               | <b>Description</b>                                                            | <b>Link/Reference</b>                                                                                                                                                     |
|---------------------------------------------|-------------------------------------------------------------------------------|---------------------------------------------------------------------------------------------------------------------------------------------------------------------------|
| Yeast                                       | Yeast cell sorting                                                            | (Smeal et al., 1996)                                                                                                                                                      |
|                                             | Mother enrichment program                                                     | (Lindstrom and Gottschling, 2009)                                                                                                                                         |
|                                             | Microdissection for replicative lifespan assays                               | (Steffen et al., 2009)                                                                                                                                                    |
|                                             | Chronological lifespan assays                                                 | (Fabrizio et al., 2001)                                                                                                                                                   |
|                                             | High throughput analysis of replicative lifespans using a microfluidic system | (Jo et al., 2015; Liu et al., 2015; Zhang et al., 2012)                                                                                                                   |
|                                             | High throughput chronological lifespan assays using a Bioscreen machine       | (Murakami et al., 2008)                                                                                                                                                   |
|                                             | ChIP-seq                                                                      | (Sen et al., 2015)                                                                                                                                                        |
|                                             | RNA-seq                                                                       | (Hu et al., 2014)                                                                                                                                                         |
|                                             | RNA-seq for detecting cryptic transcription                                   | (Sen et al., 2015)                                                                                                                                                        |
|                                             | Whole genome sequencing                                                       | (Hu et al., 2014)                                                                                                                                                         |
|                                             | MNase seq                                                                     | (Hu et al., 2014)                                                                                                                                                         |
|                                             | Worm                                                                          | Worm lifespan measurement                                                                                                                                                 |
| ChIP-seq                                    |                                                                               | <a href="http://www.wormbook.org/chapters/www_chromatinanalysis/chromatinanalysis.html">http://www.wormbook.org/chapters/www_chromatinanalysis/chromatinanalysis.html</a> |
| RNA-seq                                     |                                                                               | (Pu et al., 2015), (Sen et al., 2015)                                                                                                                                     |
| RNA-seq for detecting cryptic transcription |                                                                               | (Sen et al., 2015)                                                                                                                                                        |
| Fly                                         | Fly lifespan measurement                                                      | Journal of Visualized Experiments, Science Education Database. Essentials of Developmental Biology. Invertebrate Lifespan Quantification, 2015                            |
|                                             | ChIP-seq                                                                      | <a href="http://www.modencode.org/">http://www.modencode.org/</a>                                                                                                         |
|                                             | RNA-seq                                                                       | (Daines et al., 2011)                                                                                                                                                     |
| Killifish                                   | ChIP-seq                                                                      | (Harel et al., 2015)                                                                                                                                                      |
|                                             | RNA-seq                                                                       |                                                                                                                                                                           |
|                                             | CRISPR-mediated gene knockout                                                 |                                                                                                                                                                           |
| Mouse models                                | ChIP-seq                                                                      | (Visel et al., 2009)                                                                                                                                                      |
|                                             | RNA-seq                                                                       | <a href="http://www.mouseencode.org/">http://www.mouseencode.org/</a>                                                                                                     |
|                                             | CRISPR-mediated gene knockout                                                 | <a href="http://www.genome-engineering.org/crispr/">http://www.genome-engineering.org/crispr/</a>                                                                         |
| Cell cultures                               | ChIP-seq                                                                      | (Shah et al., 2013)                                                                                                                                                       |
|                                             | RNA-seq                                                                       | (Rai et al., 2014)                                                                                                                                                        |
|                                             | CRISPR-mediated gene knockout                                                 | <a href="http://www.genome-engineering.org/crispr/">http://www.genome-engineering.org/crispr/</a>                                                                         |

**References**

Daines, B., Wang, H., Wang, L., Li, Y., Han, Y., Emmert, D., Gelbart, W., Wang, X., Li, W., Gibbs, R., *et al.* (2011). The *Drosophila melanogaster* transcriptome by paired-end RNA sequencing. *Genome Res* 21, 315-324.

Fabrizio, P., Pozza, F., Pletcher, S.D., Gendron, C.M., and Longo, V.D. (2001). Regulation of longevity and stress resistance by Sch9 in yeast. *Science* 292, 288-290.



Harel, I., Benayoun, B.A., Machado, B., Singh, P.P., Hu, C.K., Pech, M.F., Valenzano, D.R., Zhang, E., Sharp, S.C., Artandi, S.E., *et al.* (2015). A platform for rapid exploration of aging and diseases in a naturally short-lived vertebrate. *Cell* **160**, 1013-1026.

Hu, Z., Chen, K., Xia, Z., Chavez, M., Pal, S., Seol, J.H., Chen, C.C., Li, W., and Tyler, J.K. (2014). Nucleosome loss leads to global transcriptional up-regulation and genomic instability during yeast aging. *Genes Dev* **28**, 396-408.

Jo, M.C., Liu, W., Gu, L., Dang, W., and Qin, L. (2015). High-throughput analysis of yeast replicative aging using a microfluidic system. *Proc Natl Acad Sci U S A* **112**, 9364-9369.

Lindstrom, D.L., and Gottschling, D.E. (2009). The mother enrichment program: a genetic system for facile replicative life span analysis in *Saccharomyces cerevisiae*. *Genetics* **183**, 413-422, 411SI-413SI.

Liu, P., Young, T.Z., and Acar, M. (2015). Yeast Replicator: A High-Throughput Multiplexed Microfluidics Platform for Automated Measurements of Single-Cell Aging. *Cell Rep* **13**, 634-644.

Murakami, C.J., Burtner, C.R., Kennedy, B.K., and Kaerberlein, M. (2008). A method for high-throughput quantitative analysis of yeast chronological life span. *J Gerontol A Biol Sci Med Sci* **63**, 113-121.

Pu, M., Ni, Z., Wang, M., Wang, X., Wood, J.G., Helfand, S.L., Yu, H., and Lee, S.S. (2015). Trimethylation of Lys36 on H3 restricts gene expression change during aging and impacts life span. *Genes Dev* **29**, 718-731.

Rai, T.S., Cole, J.J., Nelson, D.M., Dikovskaya, D., Faller, W.J., Vizioli, M.G., Hewitt, R.N., Anannya, O., McBryan, T., Manoharan, I., *et al.* (2014). HIRA orchestrates a dynamic chromatin landscape in senescence and is required for suppression of neoplasia. *Genes Dev* **28**, 2712-2725.

Sen, P., Dang, W., Donahue, G., Dai, J., Dorsey, J., Cao, X., Liu, W., Cao, K., Perry, R., Lee, J.Y., *et al.* (2015). H3K36 methylation promotes longevity by enhancing transcriptional fidelity. *Genes Dev* **29**, 1362-1376.

Shah, P.P., Donahue, G., Otte, G.L., Capell, B.C., Nelson, D.M., Cao, K., Aggarwala, V., Cruickshanks, H.A., Rai, T.S., McBryan, T., *et al.* (2013). Lamin B1 depletion in senescent cells triggers large-scale changes in gene expression and the chromatin landscape. *Genes Dev* **27**, 1787-1799.

Smeal, T., Claus, J., Kennedy, B., Cole, F., and Guarente, L. (1996). Loss of transcriptional silencing causes sterility in old mother cells of *S. cerevisiae*. *Cell* **84**, 633-642.

Steffen, K.K., Kennedy, B.K., and Kaerberlein, M. (2009). Measuring replicative life span in the budding yeast. *J Vis Exp*.

Visel, A., Blow, M.J., Li, Z., Zhang, T., Akiyama, J.A., Holt, A., Plajzer-Frick, I., Shoukry, M., Wright, C., Chen, F., *et al.* (2009). ChIP-seq accurately predicts tissue-specific activity of enhancers. *Nature* **457**, 854-858.

Zhang, Y., Luo, C., Zou, K., Xie, Z., Brandman, O., Ouyang, Q., and Li, H. (2012). Single cell analysis of yeast replicative aging using a new generation of microfluidic device. *PLoS One* **7**, e48275.
